# Supplementary material for: Crystallinity regulation-induced organic degradation on ultra-thin 2D Co3O4/SiO2 nanosheets: the critical trigger of oxygen vacancies
Source: Royal Society of Chemistry journal article supplement (doi:10.1039/d4en00134f), 2024-01-01
Supplement: d4en00134f1.pdf [file d4en00134f1.pdf]

**Supplementary Information for**

**Crystallinity regulation induced organics degradation on  
Ultra-thin 2D Co<sub>3</sub>O<sub>4</sub>/SiO<sub>2</sub> Nanosheets: the critical trigger  
of oxygen vacancy**

*Wenhui Bai, Hongze Lu, Yang Liu, Xue Yuan, Yuejie Ai, Lidong Wang\* and Zhe  
Chen\**

*MOE Key Lab of Resources and Environmental System optimization, College of  
Environmental Science and Engineering, North China Electric Power University,  
Beijing 102206, P. R. China.*

*Email: [chenz@ncepu.edu.cn](mailto:chenz@ncepu.edu.cn) (Prof. Zhe Chen); [wld@ncepu.edu.cn](mailto:wld@ncepu.edu.cn) (Prof. Lidong  
Wang)*

**Text S1.** Sources of chemicals.

**Text S2.** PMS utilization ratio calculation formula.

**Text S3.** Electrochemical analysis tests.

**Text S4.** Methods for measuring the concentration of active species.

**Text S5.** The degradation rate (k) of SMX by different active species.

**Text S6.** The HPLC methods in the experiment section.

**Fig. S1.** SEM image of Hemi-Co<sub>3</sub>O<sub>4</sub>/SiO<sub>2</sub>.

**Fig. S2.** The SMX removal by individual PMS and Hemi-Co<sub>3</sub>O<sub>4</sub>/SiO<sub>2</sub>.

- Fig. S3.** The total organic carbon content in different catalyst/PMS systems.
- Fig. S4.** The SMX degradation activity with Hemi-Co<sub>3</sub>O<sub>4</sub>/SiO<sub>2</sub> at different pH.
- Fig. S5.** The SMX degradation by Hemi-Co<sub>3</sub>O<sub>4</sub>/SiO<sub>2</sub> in the atmosphere and nitrogen-bubbling conditions.
- Fig. S6.** The FTIR spectra of bulk cobalt oxide and Hemi-Co<sub>3</sub>O<sub>4</sub>/SiO<sub>2</sub>.
- Fig. S7.** The I-t curves of Hemi-Co<sub>3</sub>O<sub>4</sub>/SiO<sub>2</sub>.
- Fig. S8.** The effect of leaching solution of Hemi-Co<sub>3</sub>O<sub>4</sub>/SiO<sub>2</sub> on the degradation property of SMX.
- Fig. S9.** The EPR spectra of SO<sub>4</sub>•<sup>-</sup> after the reaction obtained using DMPO as spin-trapping agents.
- Fig. S10.** The N<sub>2</sub> adsorption–desorption isotherms of Hemi-Co<sub>3</sub>O<sub>4</sub>/SiO<sub>2</sub>, A-Co<sub>3</sub>O<sub>4</sub>/SiO<sub>2</sub> and C-Co<sub>3</sub>O<sub>4</sub>/SiO<sub>2</sub>.
- Fig. S11.** The effect of different real water samples on SMX removal efficiency.
- Fig. S12.** The XRD of Hemi-Co<sub>3</sub>O<sub>4</sub>/SiO<sub>2</sub> before and after the reaction.
- Fig. S13.** Degradation performance of Hemi-Co<sub>3</sub>O<sub>4</sub>/SiO<sub>2</sub> on various refractory drugs.
- Fig. S14.** The optimized structures of (a) bulk cobalt oxide, (b) C-Co<sub>3</sub>O<sub>4</sub> and (c) Hemi-Co<sub>3</sub>O<sub>4</sub>.
- Fig. S15.** The optimized structures of (a) isolated PMS, (b) bulk cobalt oxide@PMS

and (c) C-Co<sub>3</sub>O<sub>4</sub>@PMS in Type II mode.

**Fig. S16.** The difference charge density of (a) bulk cobalt oxide @PMS and (b) C-Co<sub>3</sub>O<sub>4</sub>@PMS systems. The iso-surface value was set as 0.003 e/Bohr<sup>3</sup>, and the yellow and cyan bubbles were represented as the charge accumulation and reduction, respectively.

**Fig. S17.** The optimized structures of reaction intermediates of <sup>1</sup>O<sub>2</sub> generation on C-Co<sub>3</sub>O<sub>4</sub>.

**Table S1.** The adsorption free energies of C-Co<sub>3</sub>O<sub>4</sub>@PMS and bulk cobalt oxide@PMS in two types mode.

**Table S2.** Economic Evaluations for SMX removal through different advanced oxidation processes (AOPs).

**Table S3.** Comparison of catalytic activities between Co<sub>3</sub>O<sub>4</sub>/SiO<sub>2</sub> catalysts and the previous reports.

**Table S4.** The degradation of various refractory drugs with Hemi-Co<sub>3</sub>O<sub>4</sub>/SiO<sub>2</sub>.

**Table S5.** Percentage of peak area of cobalt ions of different valence states in XPS.

**Table S6.** Percentage of peak areas of different oxygen species in XPS.

**Table S7.** The concentration of SO<sub>4</sub>•<sup>-</sup> in solution after reaction.

### **Text S1. Sources of chemicals**

All chemicals were of analytically pure reagent and used without further purification. The  $\text{CoCl}_2 \cdot 6\text{H}_2\text{O}$ , NaOH, tert-butanol (TBA), Methanol, p-benzoquinone (p-BQ), and furfuryl alcohol (FFA) and Sulfamethoxazole (SMX) were purchased from Aladdin Company. Peroxymonosulfate (PMS,  $\text{KHSO}_5 \cdot 0.5\text{KHSO}_4 \cdot 0.5\text{K}_2\text{SO}_4$ ) was purchased from Alfa Aesar. L-hisditine ( $\text{C}_6\text{H}_9\text{N}_3\text{O}_2$ ) was purchased from TCI. The acetone was purchased from Sinopharm Co, Ltd, and the sodium thiosulfate ( $\text{Na}_2\text{S}_2\text{O}_3 \cdot 5\text{H}_2\text{O}$ ) from Macklin Company. All the aqueous solutions were prepared by using Milli-Q water.

### **Text S2. PMS utilization ratio calculation formula**

Eq. S1: 
$$\text{PMS utilization ratio} = \frac{\Delta n(\text{pollutant})}{\Delta n(\text{PMS})} \times 100\%$$

In the equation,  $\Delta n(\text{SMX})$  represented the molar amount of pollutant removed and  $\Delta n(\text{PMS})$  denoted the molar amount of PMS consumed.

### **Text S3. Electrochemical analysis tests.**

The electrochemical analysis was carried out on electrochemical workstation (Koster CS3104). Pt wire and Ag/AgCl electrode were used as the counter and reference electrodes, respectively, while catalyst-modified glassy carbon served as the working electrode. The catalyst ink was prepared by sufficiently sonicating the mixture

of the catalyst (2 mg), isopropyl alcohol (0.74 mL), Nafion solution (0.02 mL), and DI H<sub>2</sub>O (0.24 mL). The glass carbon was then modified with the catalyst ink (10 µL) to achieve the desired catalyst loading amount (0.1 mg cm<sup>-2</sup>). PMS and SMX were added at given intervals to final concentrations of 50 mg L<sup>-1</sup> and 20 mg L<sup>-1</sup>. Test results: PMS was added in 21 min and SMX was added in 42 min. There was no obvious current response.

**Text S4. Methods for measuring the concentration of active species.**

Eq. S2: 
$$N_x = \frac{A_x G_x}{A_s G_s} N_s$$

In the equation, (N) represents the spin number of the sample, (A) represents the line integral area of the spectrum, (G) represents the amplification factor of the test, and (s) represents the standard sample while (x) represents the unknown sample.

**Text S5. The degradation rate (k) of SMX by different active species.**

Eq. S3: 
$$k = \frac{(1 - m_x) - (1 - n_x)}{(1 - m_x)} k_x$$

In the equation, (m<sub>x</sub>) Percentage of undegraded SMX without scavengers in 2 min, (n<sub>x</sub>) Percentage of undegraded SMX with scavengers in 2 min, and (k<sub>x</sub>) Rate constants for different catalysts in 2 min.

**Text S6. The HPLC methods in the experiment section.**

All the samples under text were filtered with 0.22 µm polyethersulfone syringe

membrane filter to determine the concentration via HPLC (Agilent 1260 Infinity II, USA) with an Agilent InfinityLab Poroshell 120 EC-C18 column ( $4.6 \times 150$  mm,  $4 \mu\text{m}$ ).

**BPA:** The mobile phase was a mixture of 70% methanol and 30% water. The flow rate and injection volumes were 0.5 mL/min and  $10 \mu\text{L}$ , respectively. The detector wavelength was set at 225 nm. **CBZ:** The mobile phase was a mixture of 40% methanol and 60% water. The flow rate and injection volumes were 0.5 mL/min and  $10 \mu\text{L}$ , respectively. The detector wavelength was set at 210 nm. **ATZ:** The mobile phase was a mixture of 20% methanol and 80% water. The flow rate and injection volumes were 0.5 mL/min and  $10 \mu\text{L}$ , respectively. The detector wavelength was set at 220 nm. **SMX:** The mobile phase was a mixture of 25% (0.1% Formic acid) and 75% water. The flow rate and injection volumes were 0.6 mL/min and  $20 \mu\text{L}$ , respectively. The detector wavelength was set at 554 nm.

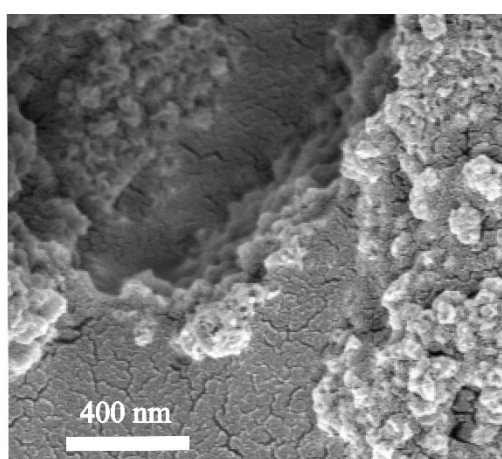

**Fig. S1.** SEM image of Hemi-Co<sub>3</sub>O<sub>4</sub>/SiO<sub>2</sub>

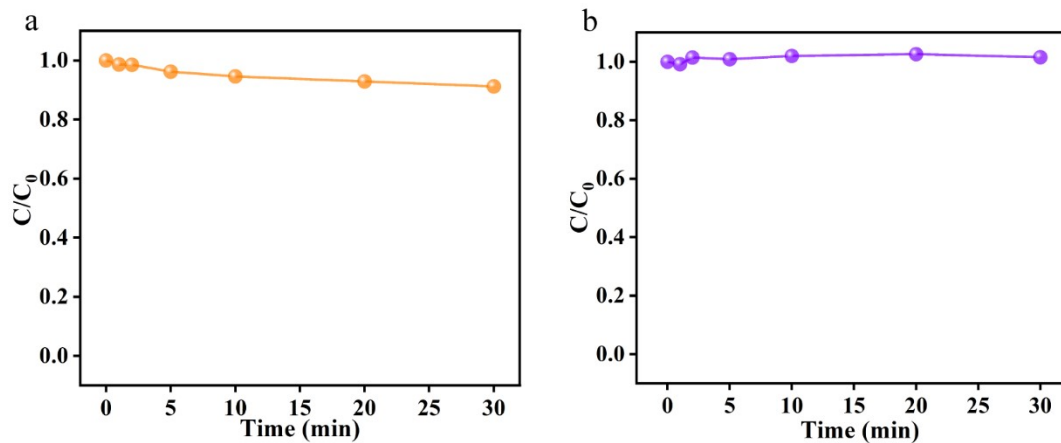

**Fig. S2.** (a)The SMX removal by individual PMS.  $[\text{SMX}] = 20 \text{ mg/L}$ ,  $[\text{PMS}] = 0.12 \text{ g/L}$ . (b)The SMX removal by individual Hemi- $\text{Co}_3\text{O}_4/\text{SiO}_2$ .  $[\text{SMX}] = 20 \text{ mg/L}$ ,  $[\text{Catalyst}] = 0.1 \text{ g/L}$ .

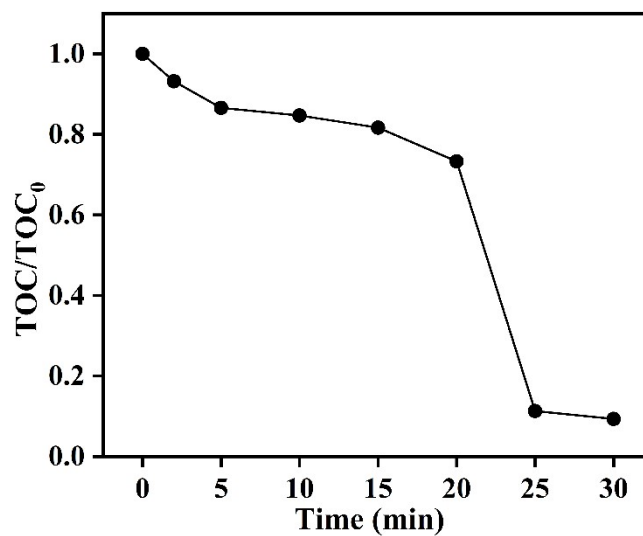

**Fig. S3.** The total organic carbon content in Hemi- $\text{Co}_3\text{O}_4/\text{SiO}_2/\text{PMS}$  systems. Reaction conditions:  $[\text{Hemi-}\text{Co}_3\text{O}_4/\text{SiO}_2] = 0.1 \text{ g/L}$ ,  $[\text{PMS}] = 0.12 \text{ g/L}$ ,  $[\text{SMX}] = 20 \text{ mg/L}$ .

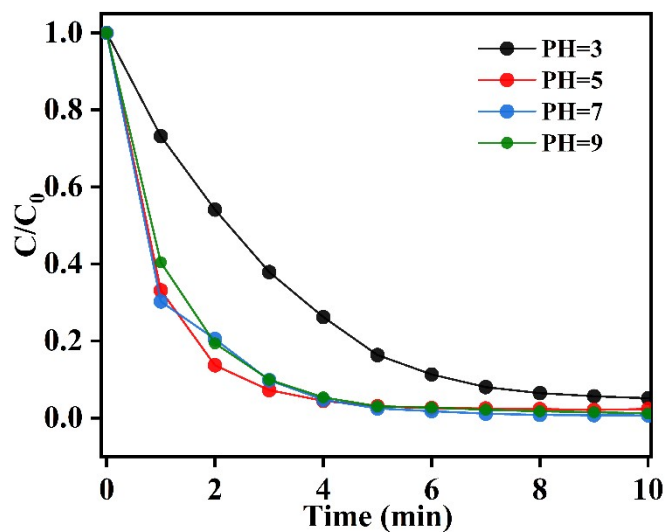

**Fig. S4.** The SMX degradation activity with Hemi-Co<sub>3</sub>O<sub>4</sub>/SiO<sub>2</sub> at different pH.

Reaction conditions: [Hemi-Co<sub>3</sub>O<sub>4</sub>/SiO<sub>2</sub>] = 0.1 g/L, [PMS] = 0.12 g/L, [SMX] = 20 mg/L.

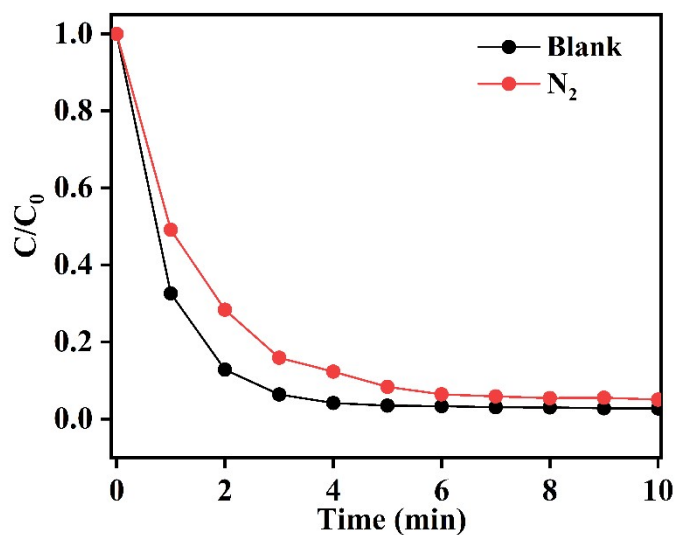

**Fig. S5.** The SMX degradation by Hemi-Co<sub>3</sub>O<sub>4</sub>/SiO<sub>2</sub> in the atmosphere and nitrogen-

bubbling conditions. Reaction conditions: [Hemi-Co<sub>3</sub>O<sub>4</sub>/SiO<sub>2</sub>] = 0.1 g/L, [PMS] =



0.12 g/L, [SMX] = 20 mg/L, [initial pH] = 5.3.

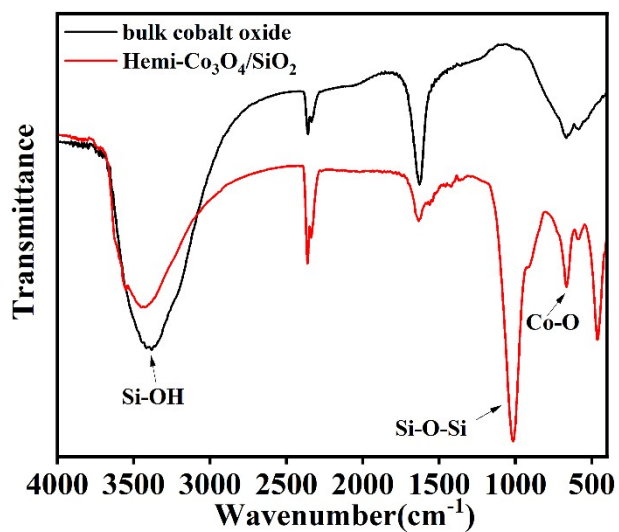

**Fig. S6.** The FTIR spectra of bulk cobalt oxide and Hemi- $\text{Co}_3\text{O}_4/\text{SiO}_2$ .

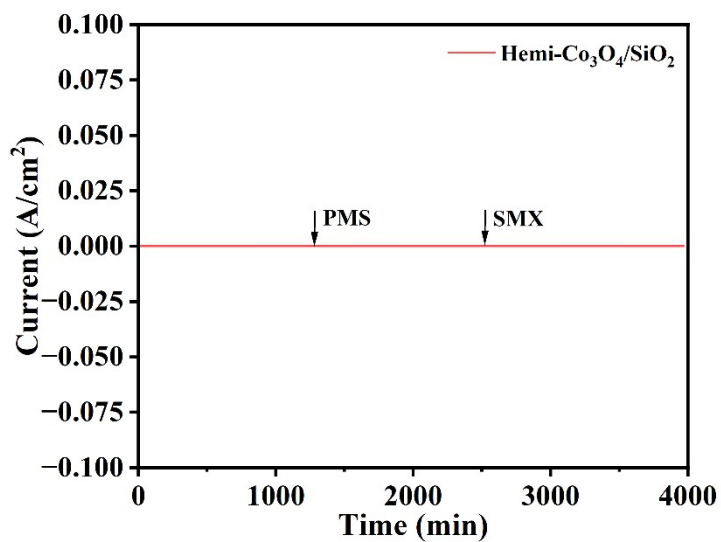

**Fig. S7.** The I-t curve of Hemi- $\text{Co}_3\text{O}_4/\text{SiO}_2$

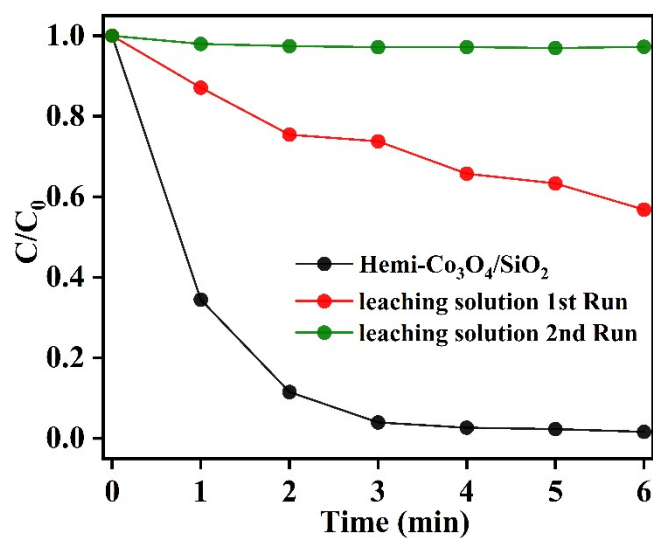

**Fig. S8.** The activity of leaching cobalt ions from Hemi-Co<sub>3</sub>O<sub>4</sub>/SiO<sub>2</sub> on the degradation of SMX. Reaction conditions: [PMS] = 0.12 g/L, [SMX] = 20 mg/L.

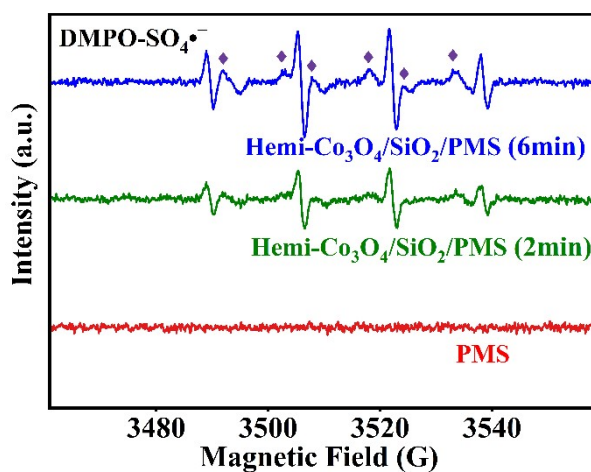

**Fig. S9.** The EPR spectra of SO<sub>4</sub>•<sup>-</sup> after the reaction obtained using DMPO as spin-trapping agents.

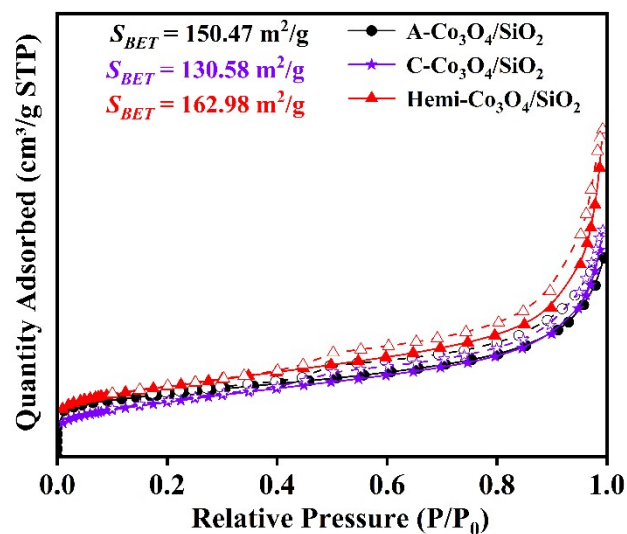

**Fig. S10.** The  $\text{N}_2$  adsorption–desorption isotherms of Hemi- $\text{Co}_3\text{O}_4/\text{SiO}_2$ , A- $\text{Co}_3\text{O}_4/\text{SiO}_2$  and C- $\text{Co}_3\text{O}_4/\text{SiO}_2$ .

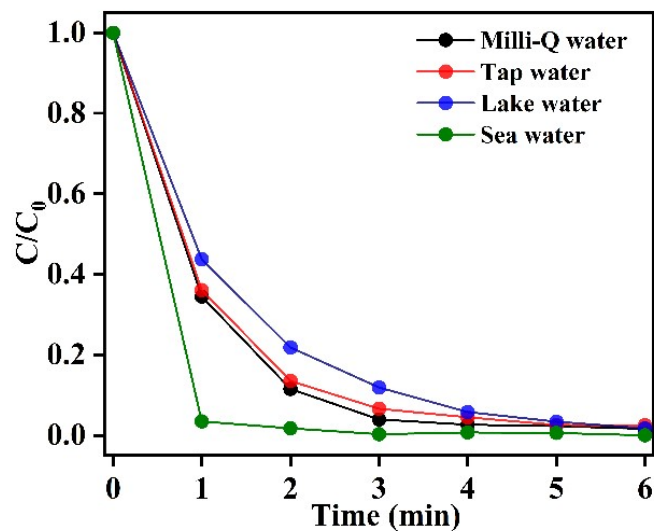

**Fig. S11.** The effect of different real water samples on SMX removal efficiency.

Reaction conditions: [ $\text{Hemi-Co}_3\text{O}_4/\text{SiO}_2$ ] = 0.1 g/L, [PMS] = 0.12 g/L, [SMX] = 20

mg/L.

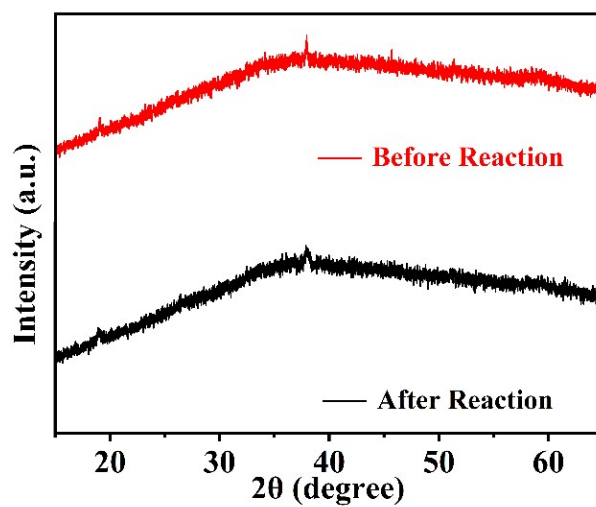

Fig. S12. The XRD of Hemi-Co<sub>3</sub>O<sub>4</sub>/SiO<sub>2</sub> before and after the reaction.

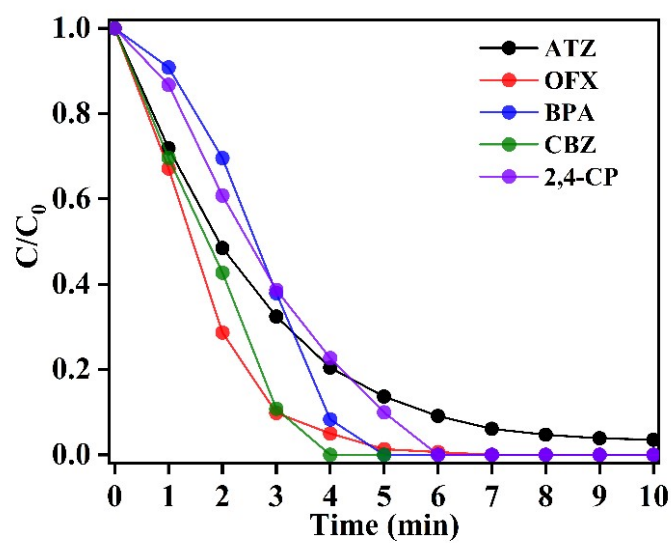

Fig. S13. Degradation performance of Hemi-Co<sub>3</sub>O<sub>4</sub>/SiO<sub>2</sub> on various refractory drugs.

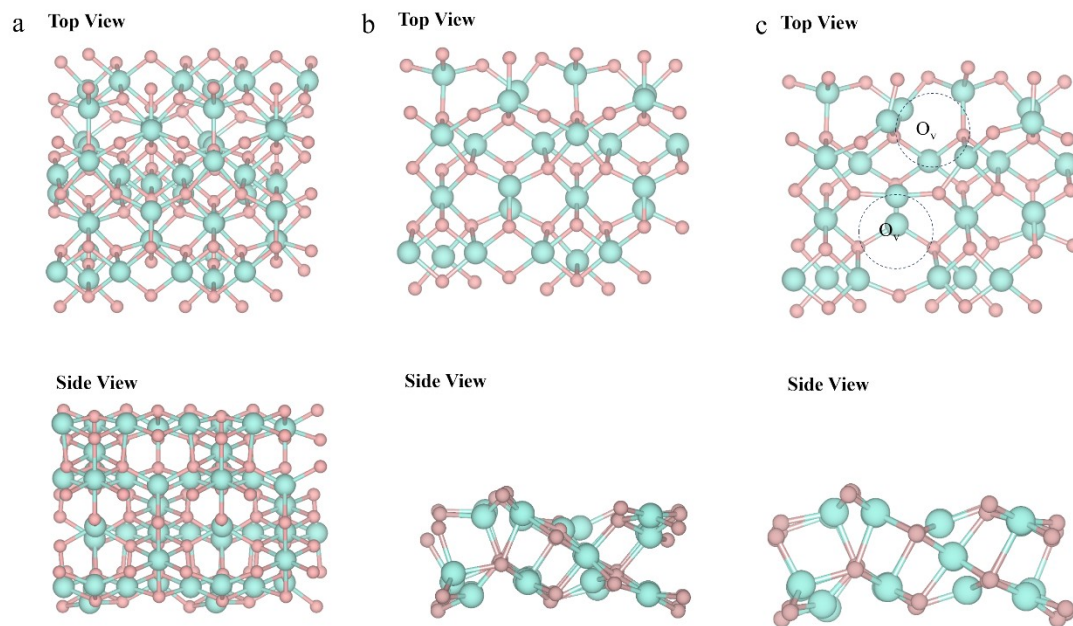

**Fig. S14.** The optimized structures of (a) bulk cobalt oxide, (b) C-Co<sub>3</sub>O<sub>4</sub> and (c) Hemi-Co<sub>3</sub>O<sub>4</sub>.

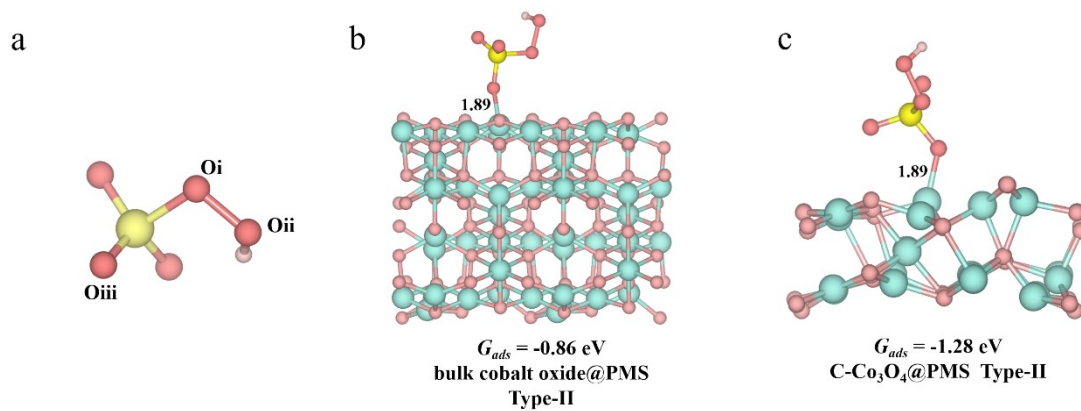

**Fig. S15.** The optimized structures of (a) isolated PMS, (b) bulk cobalt oxide@PMS and (c) C-Co<sub>3</sub>O<sub>4</sub>@PMS in Type II mode.

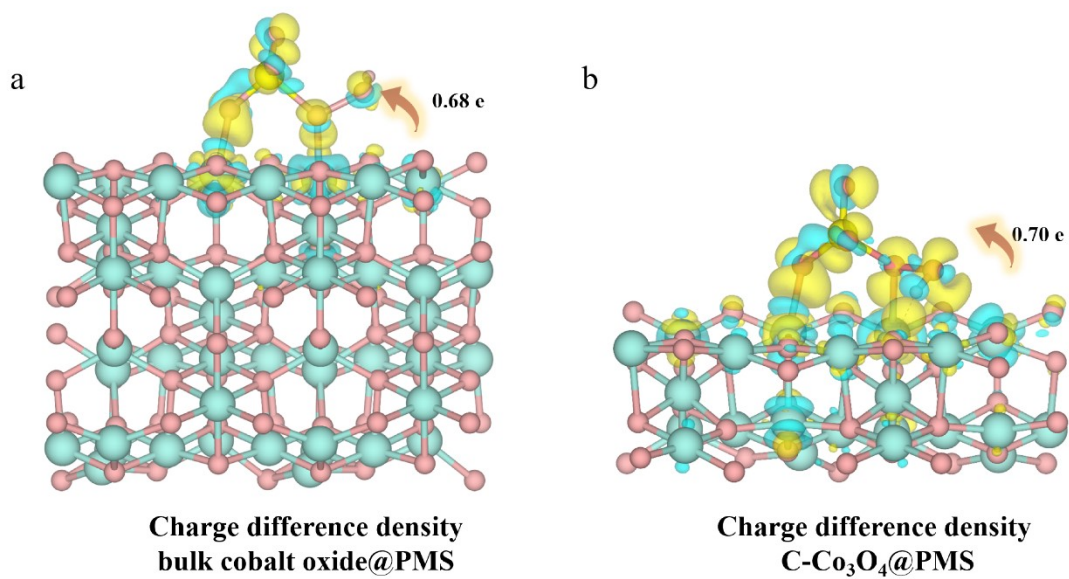

**Fig. S16.** The difference charge density of (a) bulk cobalt oxide @PMS and (b) C-Co<sub>3</sub>O<sub>4</sub>@PMS systems. The iso-surface value was set as 0.003 e/Bohr<sup>3</sup>, and the yellow and cyan bubbles were represented as the charge accumulation and reduction, respectively.

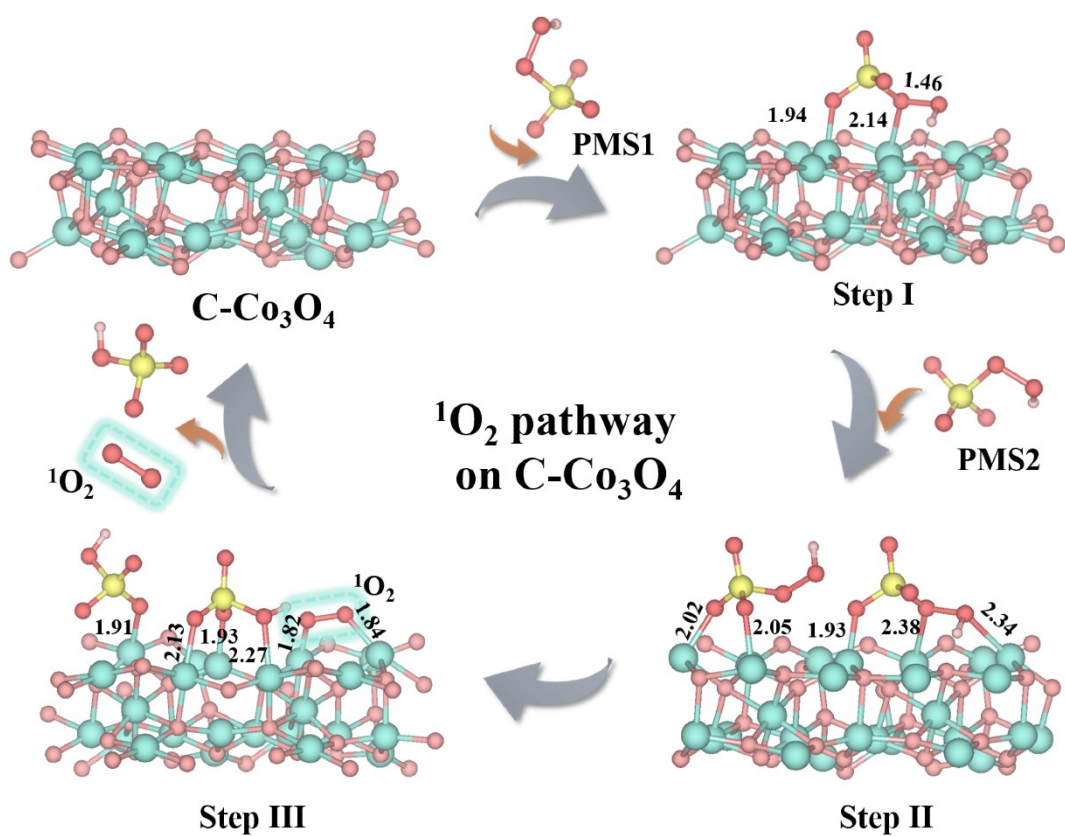

**Fig. S17.** The optimized structures of reaction intermediates of  $^1\text{O}_2$  generation on C- $\text{Co}_3\text{O}_4$

**Table S1.** The adsorption free energies of C- $\text{Co}_3\text{O}_4$ @PMS and bulk cobalt oxide@PMS in two types mode.

| $\text{Co}_3\text{O}_4$ -based catalysts | Binding configurations | $G_{\text{ads}}(\text{eV})$ |
|------------------------------------------|------------------------|-----------------------------|
| C- $\text{Co}_3\text{O}_4$               | Type I                 | -1.56                       |
|                                          | Type II                | -1.28                       |
| bulk cobalt oxide                        | Type I                 | -1.33                       |
|                                          | Type II                | -0.86                       |

**Table S2.** Economic Evaluations for SMX removal through different advanced oxidation processes (AOPs).

| Catalysts                                         | Reaction system (L) | Time (min) | Contaminant concentration (mg/L) | Oxidant & Chemicals                                                 | Energy cost (\$/m <sup>3</sup> ) | Chemical cost (\$/m <sup>3</sup> ) | Total cost of treatment (\$/m <sup>3</sup> ) | Ref. |
|---------------------------------------------------|---------------------|------------|----------------------------------|---------------------------------------------------------------------|----------------------------------|------------------------------------|----------------------------------------------|------|
| CoFe/ZSM-5                                        | 0.5                 | 60         | 10                               | CoFe/ZSM-5<br>= 0.3 g/L<br>PMS=2 mM                                 | -                                | 1.29                               | 1.29                                         | 1    |
| Co/CN-650                                         | 0.03                | 8          | 10                               | Co-Cu@g-C <sub>3</sub> N <sub>4</sub> -2<br>= 0.1 g/L<br>PMS=0.5 mM | -                                | 3.26                               | 3.26                                         | 2    |
| EB/H <sub>2</sub> O <sub>2</sub>                  | -                   | -          | -                                | EB=25 kGy<br>PMS=10 mM                                              | 2.44                             | 0.15-0.30                          | 2.59-2.74                                    | 3    |
| CoS <sub>x</sub> @SiO <sub>2</sub>                | 0.05                | 10         | 5                                | CoS <sub>x</sub> @SiO <sub>2</sub> =<br>0.2 g/L<br>PMS=0.2 mM       | -                                | 4.58                               | 4.58                                         | 4    |
| Co <sub>x</sub> Fe <sub>1-x</sub> WO <sub>4</sub> | 0.1                 | 15         | 10                               | Co <sub>x</sub> Fe <sub>1-x</sub> WO <sub>4</sub><br>PMS=0.33 mM    | -                                | 0.732                              | 0.732                                        | 5    |



|                                                       |      |   |    |                                                                                 |       |       |              |
|-------------------------------------------------------|------|---|----|---------------------------------------------------------------------------------|-------|-------|--------------|
| Hemi-Co <sub>3</sub> O <sub>4</sub> /SiO <sub>2</sub> | 0.05 | 6 | 20 | Hemi-Co <sub>3</sub> O <sub>4</sub> /SiO <sub>2</sub><br>=0.1g/L<br>PMS=0.39 mM | 0.588 | 0.588 | This<br>Work |
|-------------------------------------------------------|------|---|----|---------------------------------------------------------------------------------|-------|-------|--------------|

Note: Calculated amounts were approximate.

PMS cost = 1.3 \$/kg; FeSO<sub>4</sub>•7H<sub>2</sub>O cost = 1.57 \$/kg; CoCl<sub>2</sub>•6H<sub>2</sub>O cost = 6.71 \$/kg; TAA cost =2.09 \$/kg; FeCl<sub>2</sub>•4H<sub>2</sub>O cost =1.23 \$/kg;

Na<sub>2</sub>WO<sub>4</sub>•2H<sub>2</sub>O cost = 9.25 \$/kg; Co(NO<sub>3</sub>)<sub>2</sub>•6H<sub>2</sub>O cost = 8.37 \$/kg; TMAH cost = 2.21 \$/kg; TEOS cost =1.54 \$/kg; FeCl<sub>2</sub> cost =1.09 \$/kg;

C<sub>3</sub>H<sub>6</sub>N<sub>6</sub> = cost = 0.59 \$/kg; Ethylene glycol cost = 0.70 \$/kg; citric acid cost = 0.29 \$/kg; urea=0.63 \$/kg

**Table S3** Comparison of catalytic activities between Co<sub>3</sub>O<sub>4</sub>/SiO<sub>2</sub> catalysts and the previous reports.

| Number | Catalyst                                              | Catalyst Dosage (g L <sup>-1</sup> ) | PMS dosage (mM) | Contaminant (mg L <sup>-1</sup> ) | pH  | Temp. (°C) | k <sub>obs</sub> (min <sup>-1</sup> ) | Pathway                | Normalized k (min <sup>-1</sup> M <sup>-1</sup> ) | Ref.      |
|--------|-------------------------------------------------------|--------------------------------------|-----------------|-----------------------------------|-----|------------|---------------------------------------|------------------------|---------------------------------------------------|-----------|
| 1      | Hemi-Co <sub>3</sub> O <sub>4</sub> /SiO <sub>2</sub> | 0.1                                  | 0.39            | 20                                | 5.8 | 25         | 1.10                                  | Radical and nonradical | 564.1                                             | This work |
| 2      | C-Co <sub>3</sub> O <sub>4</sub> /SiO <sub>2</sub>    | 0.1                                  | 0.39            | 20                                | 5.8 | 25         | 0.408                                 | Radical and            | 209.23                                            | This      |

---

|    |                                                    |       |      |    |       |                         |         |                           |        |              |
|----|----------------------------------------------------|-------|------|----|-------|-------------------------|---------|---------------------------|--------|--------------|
|    |                                                    |       |      |    |       |                         |         | nonradical                |        | work         |
| 3  | bulk cobalt oxide                                  | 0.1   | 0.39 | 20 | 5.8   | 25                      | 0.225   | Radical and<br>nonradical | 115.38 | This<br>work |
| 4  | A-Co <sub>3</sub> O <sub>4</sub> /SiO <sub>2</sub> | 0.1   | 0.39 | 20 | 5.8   | 25                      | 0.63    | Radical and<br>nonradical | 323.08 | This<br>work |
| 5  | C <sub>3</sub> N <sub>5</sub> -Co <sub>0.59</sub>  | 0.5   | 0.8  | 10 | 11.03 | Room<br>temper<br>ature | 0.35158 | Radical and<br>nonradical | 8.7895 | 6            |
| 6  | OMC-Co-T800                                        | 0.1   | 0.65 | 10 | 5.8   | 25                      | 0.1988  | Radical                   | 30.58  | 7            |
| 7  | Co-N-CNTs                                          | 0.1   | 1    | 10 | 6.8   | 25                      | 0.0008  | Radical and<br>nonradical | 0.08   | 8            |
| 8  | GcN/Co                                             | 0.1   | 1    | 5  | 7.1   | Room<br>temper<br>ature | 0.2028  | Radical and<br>nonradical | 10.14  | 9            |
| 9  | Co-NC-C                                            | 0.1   | 0.33 | 20 | 7.08  | 25                      | 0.038   | Radical and<br>nonradical | 23.03  | 10           |
| 10 | CoNCWS800                                          | 0.051 | 0.6  | 15 | 5.14  | 25                      | 0.1001  | Radical and<br>nonradical | 49.07  | 11           |

---

|    |                                             |      |      |      |       |                  |        |                        |         |    |
|----|---------------------------------------------|------|------|------|-------|------------------|--------|------------------------|---------|----|
| 11 | CoS <sub>x</sub> @SiO <sub>2</sub>          | 0.2  | 0.2  | 5    | 5.1   | 25               | 0.7286 | Radical and nonradical | 91.075  | 4  |
| 12 | CoFeO <sub>4</sub>                          | 0.1  | 0.2  | 2.53 | 6     | room temperature | 0.1172 | Radical                | 14.8258 | 12 |
| 13 | Co-Fe/NC <sub>0.7</sub> @GCS                | 0.4  | 0.5  | 30   | 5.76  | room temperature | 0.101  | Radical and nonradical | 15.15   | 13 |
| 14 | FeCo-BC                                     | 0.1  | 0.4  | 10   | 3.4   | 25               | 0.749  | Radical and nonradical | 187.29  | 14 |
| 15 | CoMn <sub>2</sub> O <sub>4</sub>            | 0.2  | 0.2  | 12.6 | 7     | room temperature | 0.21   |                        | 66.15   | 15 |
| 16 | Co/CoO/Co <sub>9</sub> S <sub>8</sub> @NSOC | 0.1  | 0.8  | 20   | 7.88  | 25               | 1.3    | Radical and nonradical | 325     | 16 |
| 17 | LCo                                         | 0.15 | 0.4  | 2.5  | 11.88 | 30               | 0.2133 | Radical                | 11.85   | 17 |
| 18 | Fe-Co-O-g-C <sub>3</sub> N <sub>4</sub>     | 0.2  | 0.8  | 10   | 3.4   | 25               | 0.085  | Radical and nonradical | 53.125  | 18 |
| 19 | Co <sub>3</sub> O <sub>4</sub> @NCNTs       | 0.1  | 0.65 | 20   | 6.67  | 25               | 0.2224 | Radical and nonradical | 68.43   | 19 |

|    |                                                       |     |       |    |     |                  |        |                        |       |    |
|----|-------------------------------------------------------|-----|-------|----|-----|------------------|--------|------------------------|-------|----|
|    |                                                       |     |       |    |     |                  |        | nonradical             |       |    |
| 20 | Co <sub>0.70</sub> Fe <sub>0.30</sub> WO <sub>4</sub> | 0.1 | 0.325 | 10 | 7   | 25               | 0.272  | Radical                | 83.69 | 5  |
| 21 | CoOOH/BC                                              | 0.3 | 0.65  | 40 | 5.2 | room temperature | 0.443  | Radical and nonradical | 90.87 | 20 |
| 22 | B-CoOOH                                               | 0.1 | 0.3   | 10 | 9   | room temperature | 1.65   | Radical and nonradical | 550   | 21 |
| 23 | A-Co-CN/g-C <sub>3</sub> N <sub>4</sub>               | 0.2 | 1.3   | 20 | 6   | room temperature | 0.2601 | Radical and nonradical | 20.07 | 22 |

Note: The normalized kinetics were obtained via normalizing reaction rate constant ( $k_{obs}$ ) to the dosage of catalyst, oxidants, and organics via

Eq. S4: 
$$Normalized\ k = \frac{k_{obs} \cdot c_{SMX}}{c_{Catalyst} \cdot c_{PS}}$$

**Table S4. The Degradation of various refractory drugs with Hemi-Co<sub>3</sub>O<sub>4</sub>/SiO<sub>2</sub>.**

| Enter | Contaminants       | Structural formula                                                                  | Time (min) | Conversion (%) | k (mn <sup>-1</sup> ) |
|-------|--------------------|-------------------------------------------------------------------------------------|------------|----------------|-----------------------|
| 1     | Bisphenol A        | 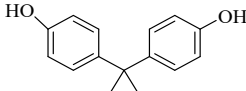   | 2          | 30.4%          | 0.182                 |
| 2     | Ofloxacin          |    | 2          | 71.3%          | 0.625                 |
| 3     | 2,4-dichlorophenol |   | 2          | 39.2%          | 0.249                 |
| 4     | Atrazine           |  | 2          | 51.5%          | 0.362                 |
| 5     | Carbamazepine      |  | 2          | 57.3%          | 0.425                 |

Note: k value is the rate constant for degradation of different pollutants over two min.

Ct: the pollutant concentration at two min (t), C<sub>0</sub> is the initial pollutant concentration

$$\text{Eq. S5: } k = \frac{-\ln\left(\frac{C_t}{C_0}\right)}{t}$$

**Table S5. Percentage of peak area of cobalt ions of different valence states in XPS.**

| Catalyst                                              | Percentage of Co <sup>2+</sup> peak | Percentage of Co <sup>3+</sup> peak |
|-------------------------------------------------------|-------------------------------------|-------------------------------------|
|                                                       | area (%)                            | area (%)                            |
| Hemi-Co <sub>3</sub> O <sub>4</sub> /SiO <sub>2</sub> | 52.2                                | 47.8                                |
| A-Co <sub>3</sub> O <sub>4</sub> /SiO <sub>2</sub>    | 45.4                                | 55.6                                |
| C-Co <sub>3</sub> O <sub>4</sub> /SiO <sub>2</sub>    | 41.1                                | 58.9                                |

Note: m: Percentage of Co<sup>2+</sup> peak area (%); n: Percentage of Co<sup>3+</sup> peak area (%)

$$\text{Eq. S6: } \frac{\text{Co}^{2+} / \text{Co}^{3+}}{m/n}$$

**Table S6. Percentage of peak areas of different oxygen species in XPS.**

| Catalyst                                              | Percentage of O <sub>Latt</sub> | Percentage of O <sub>ada</sub> | Percentage of O <sub>surf</sub> |
|-------------------------------------------------------|---------------------------------|--------------------------------|---------------------------------|
|                                                       | peak area (%)                   | peak area (%)                  | peak area (%)                   |
| Hemi-Co <sub>3</sub> O <sub>4</sub> /SiO <sub>2</sub> | 44.0                            | 41.6                           | 14.1                            |
| A-Co <sub>3</sub> O <sub>4</sub> /SiO <sub>2</sub>    | 53.4                            | 34.9                           | 11.7                            |
| C-Co <sub>3</sub> O <sub>4</sub> /SiO <sub>2</sub>    | 62.0                            | 24.5                           | 13.5                            |

**Table S7. The concentration of SO<sub>4</sub>•<sup>-</sup> in the solution after the reaction.**

| Time (min) | Concentration of SO <sub>4</sub> • <sup>-</sup> |
|------------|-------------------------------------------------|
| 2          | 1.789×10 <sup>-5</sup> mol/L                    |
| 6          | 3.702×10 <sup>-5</sup> mol/L                    |

**References**

1. Y. Li, X. Zheng, Q. Guo, X. Wang, L. Zhang, W. Zhu and Y. Luo, Activation of peroxymonosulfate by the CoFe/ZSM-5 for efficient sulfamethoxazole degradation, *J. Environ. Chem. Eng.*, 2022, **10**, 107012.
2. H. Zhang, G. Xu and Y. Yu, Co single-atom C<sub>2</sub>N<sub>3</sub> activates peroxymonosulfate for efficient degradation of sulfamethoxazole at 4°C: A combined experimental and density functional theory study, *Chem. Eng. J.*, 2023, **476**, 146721.
3. L. Chu, J. Wang, C. Chen, S. He, L. Wojnárovits and E. Takács, Advanced treatment of antibiotic wastewater by ionizing radiation combined with peroxymonosulfate/H<sub>2</sub>O<sub>2</sub> oxidation, *J. Cleaner Prod.*, 2021, **321**, 128921.
4. F. Wang, H. Fu, F.-X. Wang, X.-W. Zhang, P. Wang, C. Zhao and C.-C. Wang, Enhanced catalytic sulfamethoxazole degradation via peroxymonosulfate activation over amorphous CoS<sub>x</sub>@SiO<sub>2</sub> nanocages derived from ZIF-67, *J. Hazard. Mater.*, 2022, **423**, 126998.
5. F. Zhang, H.-N. Yan, Y.-F. Jin, L.-F. Zhai and M. Sun, Co-Fe synergy in Co<sub>x</sub>Fe<sub>1-x</sub>WO<sub>4</sub>: The new type peroxymonosulfate activator for sulfamethoxazole degradation, *Chem. Eng. J.*, 2023, **461**, 141989.
6. P. He, C. Gu, B. Tang, Y. Zhou, M. Gan and J. Zhu, Expedient degradation of SMX by high-valent cobalt-oxo species derived from cobalt-doped C<sub>3</sub>N<sub>5</sub>-activated peroxymonosulfate with the assistance of visible light, *Sep. Purif. Technol.*, 2022, **301**, 122009.

7. H. Zhang, R. Lee Smith, H. Guo and X. Qi, Cobalt cross-linked ordered mesoporous carbon as peroxymonosulfate activator for sulfamethoxazole degradation, *Chem. Eng. J.*, 2023, **472**, 145060.
8. J. Miao, Y. Zhu, J. Lang, J. Zhang, S. Cheng, B. Zhou, L. Zhang, P. J. J. Alvarez and M. Long, Spin-State-Dependent Peroxymonosulfate Activation of Single-Atom M–N Moieties via a Radical-Free Pathway, *ACS Catal.*, 2021, **11**, 9569-9577.
9. D. T. Oyekunle, D. Li, L. Zheng, F. Luo, S. Wang and Z. Chen, Enhanced degradation of organic compounds through the interfacial transfer of electrons in the presence of phosphate and Nitrogen-cobalt doped graphitic carbon, *J. Colloid Interface Sci.*, 2022, **607**, 1641-1650.
10. H. Liu, Z. He, S. Wang and S. Zhao, CoZn-ZIF and melamine co-derived double carbon layer matrix supported highly dispersed and exposed Co nanoparticles for efficient degradation of sulfamethoxazole, *Chem. Eng. J.*, 2023, **469**, 144054.
11. Y. Yu, N. Li, X. Lu, B. Yan, G. Chen, Y. Wang, X. Duan, Z. Cheng and S. Wang, Co/N co-doped carbonized wood sponge with 3D porous framework for efficient peroxymonosulfate activation: Performance and internal mechanism, *J. Hazard. Mater.*, 2022, **421**, 126735.
12. X. Li, Z. Zhao, H. Li and J. Qian, Degradation of organic contaminants in the CoFe<sub>2</sub>O<sub>4</sub>/peroxymonosulfate process: The overlooked role of Co(II)-PMS complex, *Chem. Eng. J. Adv.*, 2021, **8**, 100143.
13. A. Wang, J. Ni, W. Wang, D. Liu, Q. Zhu, B. Xue, C.-C. Chang, J. Ma and Y. Zhao, MOF Derived Co–Fe nitrogen doped graphite carbon@crosslinked magnetic chitosan Micro–nanoreactor for environmental applications: Synergy enhancement effect of adsorption–PMS activation, *Appl. Catal., B*, 2022, **319**, 121926.
14. S. Wang and J. Wang, Bimetallic and nitrogen co-doped biochar for peroxymonosulfate (PMS) activation to degrade emerging contaminants, *Sep. Purif. Technol.*, 2023, **307**, 122807.
15. T.-B. Nguyen, C. P. Huang, R.-a. Doong, M.-H. Wang, C.-W. Chen and C.-D. Dong, Manipulating the morphology of 3D flower-like CoMn<sub>2</sub>O<sub>4</sub> bimetallic catalyst for enhancing the activation of peroxymonosulfate toward the degradation of selected persistent pharmaceuticals in water, *Chem. Eng. J.*, 2022, **436**, 135244.
16. Y. Jiang, J. Wang, B. Liu, W. Jiang, T. Zhou, Y. Ma, G. Che and C. Liu, Superhydrophilic N,S,O-doped Co/CoO/Co<sub>9</sub>S<sub>8</sub>@carbon derived from metal-



- organic framework for activating peroxymonosulfate to degrade sulfamethoxazole: Performance, mechanism insight and large-scale application, *Chem. Eng. J.*, 2022, **446**, 137361.
17. Y. Chen, H. Zhang, Z. Xiong, Y. Wang, S. Peng, J. Wang and Y. Guo, Lithium cobalt oxide with excellent electron mobility: An efficient activator of peroxymonosulfate for the degradation of sulfamethoxazole, *Chem. Eng. J.*, 2022, **445**, 136702.
  18. S. Wang, Y. Liu and J. Wang, Peroxymonosulfate Activation by Fe–Co–O-Codoped Graphite Carbon Nitride for Degradation of Sulfamethoxazole, *Environ. Sci. Technol.*, 2020, **54**, 10361-10369.
  19. J. Ye, J. Dai, C. Li and Y. Yan, Lawn-like Co<sub>3</sub>O<sub>4</sub>@N-doped carbon-based catalytic self-cleaning membrane with peroxymonosulfate activation: A highly efficient singlet oxygen dominated process for sulfamethoxazole degradation, *Chem. Eng. J.*, 2021, **421**, 127805.
  20. M. Xiong, B. Chai, G. Fan, X. Zhang, C. Wang and G. Song, Immobilization CoOOH nanosheets on biochar for peroxymonosulfate activation: Built-in electric field mediated radical and non-radical pathways, *J. Colloid Interface Sci.*, 2023, **638**, 412-426.
  21. H. Zeng, H. Zhu, J. Deng, Z. Shi, H. Zhang, X. Li and L. Deng, New insight into peroxymonosulfate activation by CoAl-LDH derived CoOOH: Oxygen vacancies rather than Co species redox pairs induced process, *Chem. Eng. J.*, 2022, **442**, 136251.
  22. M. Qian, X.-L. Wu, M. Lu, L. Huang, W. Li, H. Lin, J. Chen, S. Wang and X. Duan, Modulation of Charge Trapping by Island-like Single-Atom Cobalt Catalyst for Enhanced Photo-Fenton-Like reaction, *Adv. Funct. Mater.*, 2023, **33**, 2208688.
